# Supplementary material for: Mycolactone enhances the Ca2+ leak from endoplasmic reticulum by trapping Sec61 translocons in a Ca2+ permeable state
Source: Biochem J. 2021 Nov 23;478(22):4005–24. doi: 10.1042/BCJ20210345 (PMC8650850; doi:10.1042/BCJ20210345)
Supplement: Supplementary Figures S1-S4 [file BCJ-478-4005-s1.pdf]

# **Mycolactone enhances the $\text{Ca}^{2+}$ leak from endoplasmic reticulum by trapping Sec61 translocons in a $\text{Ca}^{2+}$ permeable state**

Pratiti Bhadra, Scott Dos Santos, Igor Gamayun, Tillman Pick, Clarissa Neumann, Joy Ogbechi, Belinda S. Hall, Richard Zimmermann, Volkhart Helms, Rachel E. Simmonds, Adolfo Cavalié

## **Supplementary Figure**

**Supplementary Figure S1.** Conformations of (a) mycolactone A (Z isomer) and (b) mycolactone B (E isomer).

**Supplementary Figure S2.** Docking regions in and around human Sec61 $\alpha$  for (a) *idle* and *inhibited* states, and (b) for the *open* state.

**Supplementary Figure S3.** Effects of mycolactone on cytosolic  $\text{Ca}^{2+}$  transients of RAW 264.7 cells.

**Supplementary Figure S4.** Effects of the  $\text{Ca}^{2+}$  leak enhancer trifluoperazine on the  $\text{Ca}^{2+}$  mobilisation of HCT116 cells.

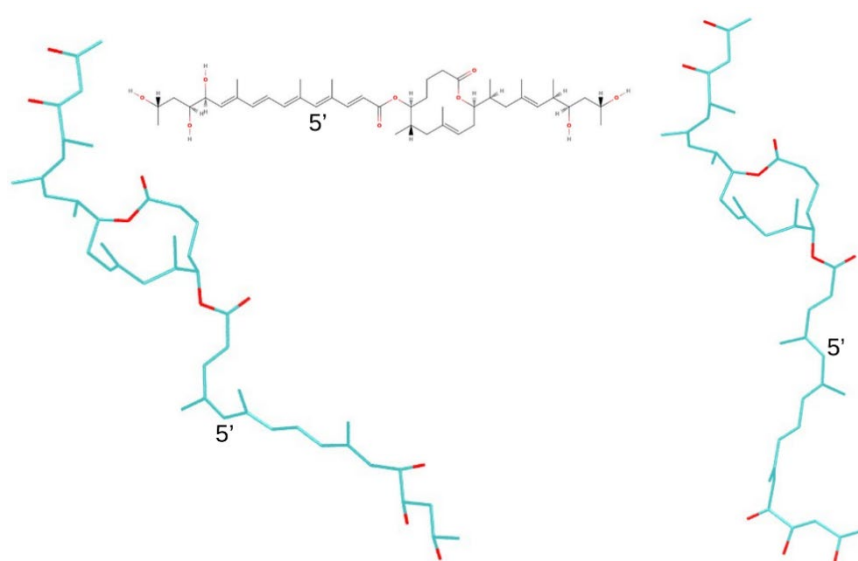

(a) Mycolactone A (Z isomer)

(b) Mycolactone B (E isomer)

**Supplementary Figure S1. Conformations of (a) mycolactone A (Z isomer) and (b) mycolactone B (E isomer).** The images were generated using VMD-1.9.4 and online PubChem Sketcher V2.4.

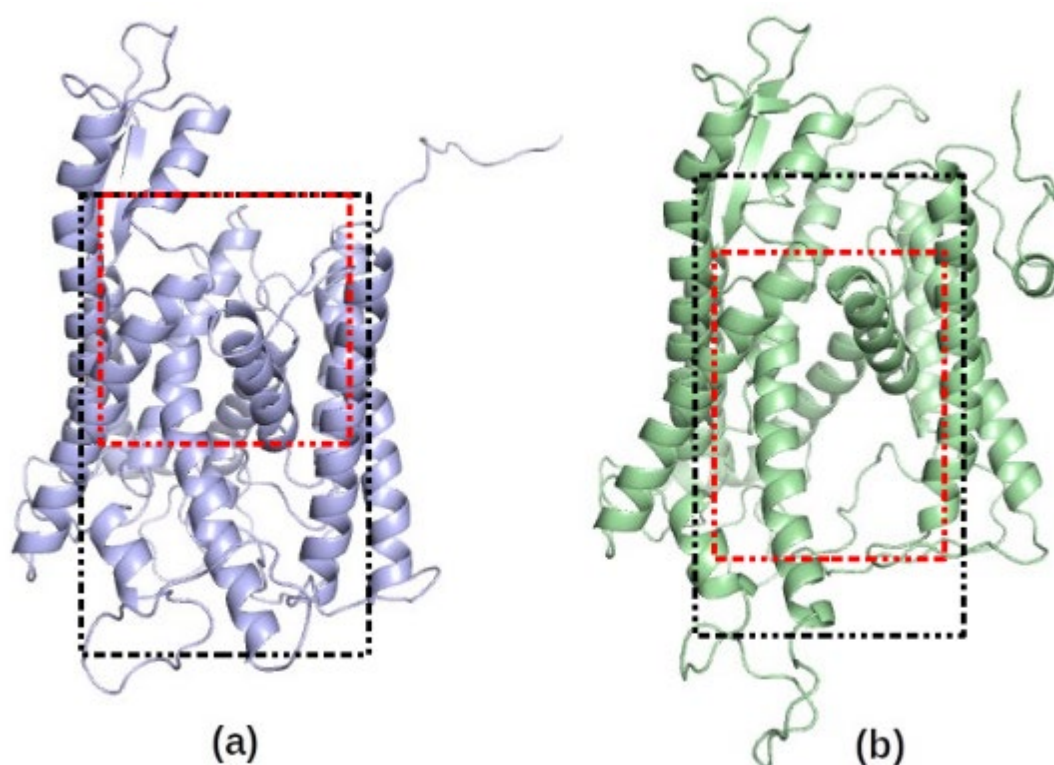

**Supplementary Figure S2. Docking regions in and around human Sec61 $\alpha$  for (a) *idle* and *inhibited* states, and (b) for the *open* state.** The black-dashed boxes represent the grid box (100 Å × 100 Å × 126 Å) used for the first stage of docking and the red-dashed boxes show the grid box used in the second (finer) docking stage (90 Å × 80 Å × 80 Å), (80 Å × 90 Å × 80 Å) and (80 Å × 80 Å × 90 Å) for *idle*, *intermediate*, and *open* state, respectively. The conformations in (a) and (b) are homology models of *idle* and *open* states, respectively.

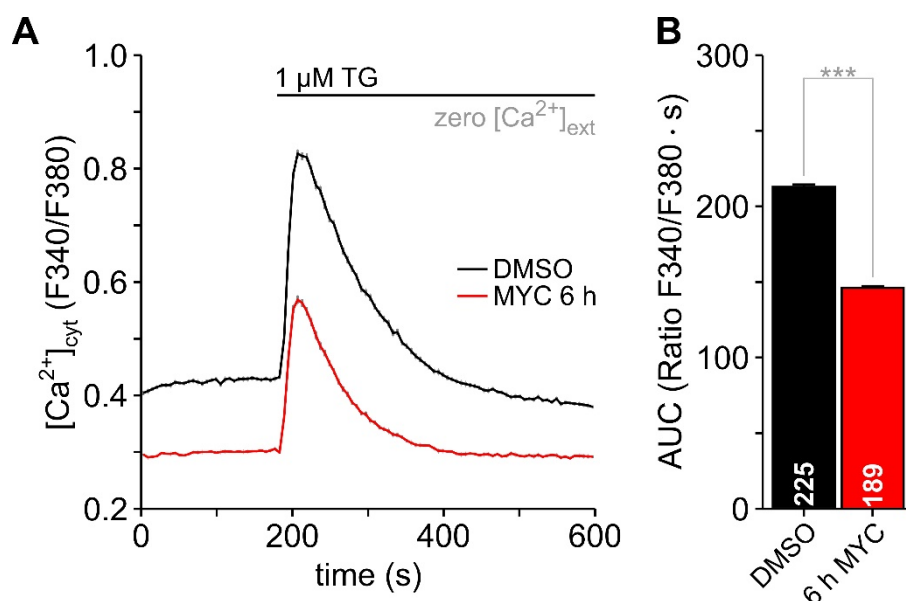

**Supplementary Figure S3. Effects of mycolactone on cytosolic  $Ca^{2+}$  transients of RAW 264.7 cells.** Cytosolic  $Ca^{2+}$  was imaged with FURA-2 and changes in  $[Ca^{2+}]_{cyt}$  are given as F340/F380 ratios. Cells were treated with 0.05 % DMSO or with 125 ng/ml mycolactone (MYC) for 6 h before FURA-2 loading and  $Ca^{2+}$  imaging.  $Ca^{2+}$  mobilisation was induced by applying thapsigargin (**A**, 1  $\mu$ M TG). The statistical analysis of the corresponding area under the curve (AUC) for DMSO and MYC treated RAW 264.7 cells is shown in **B**. Data is presented as means  $\pm$  SEM; \*\*\*,  $p < 0.001$ . The number of cells is given within the graph bars in **B**.

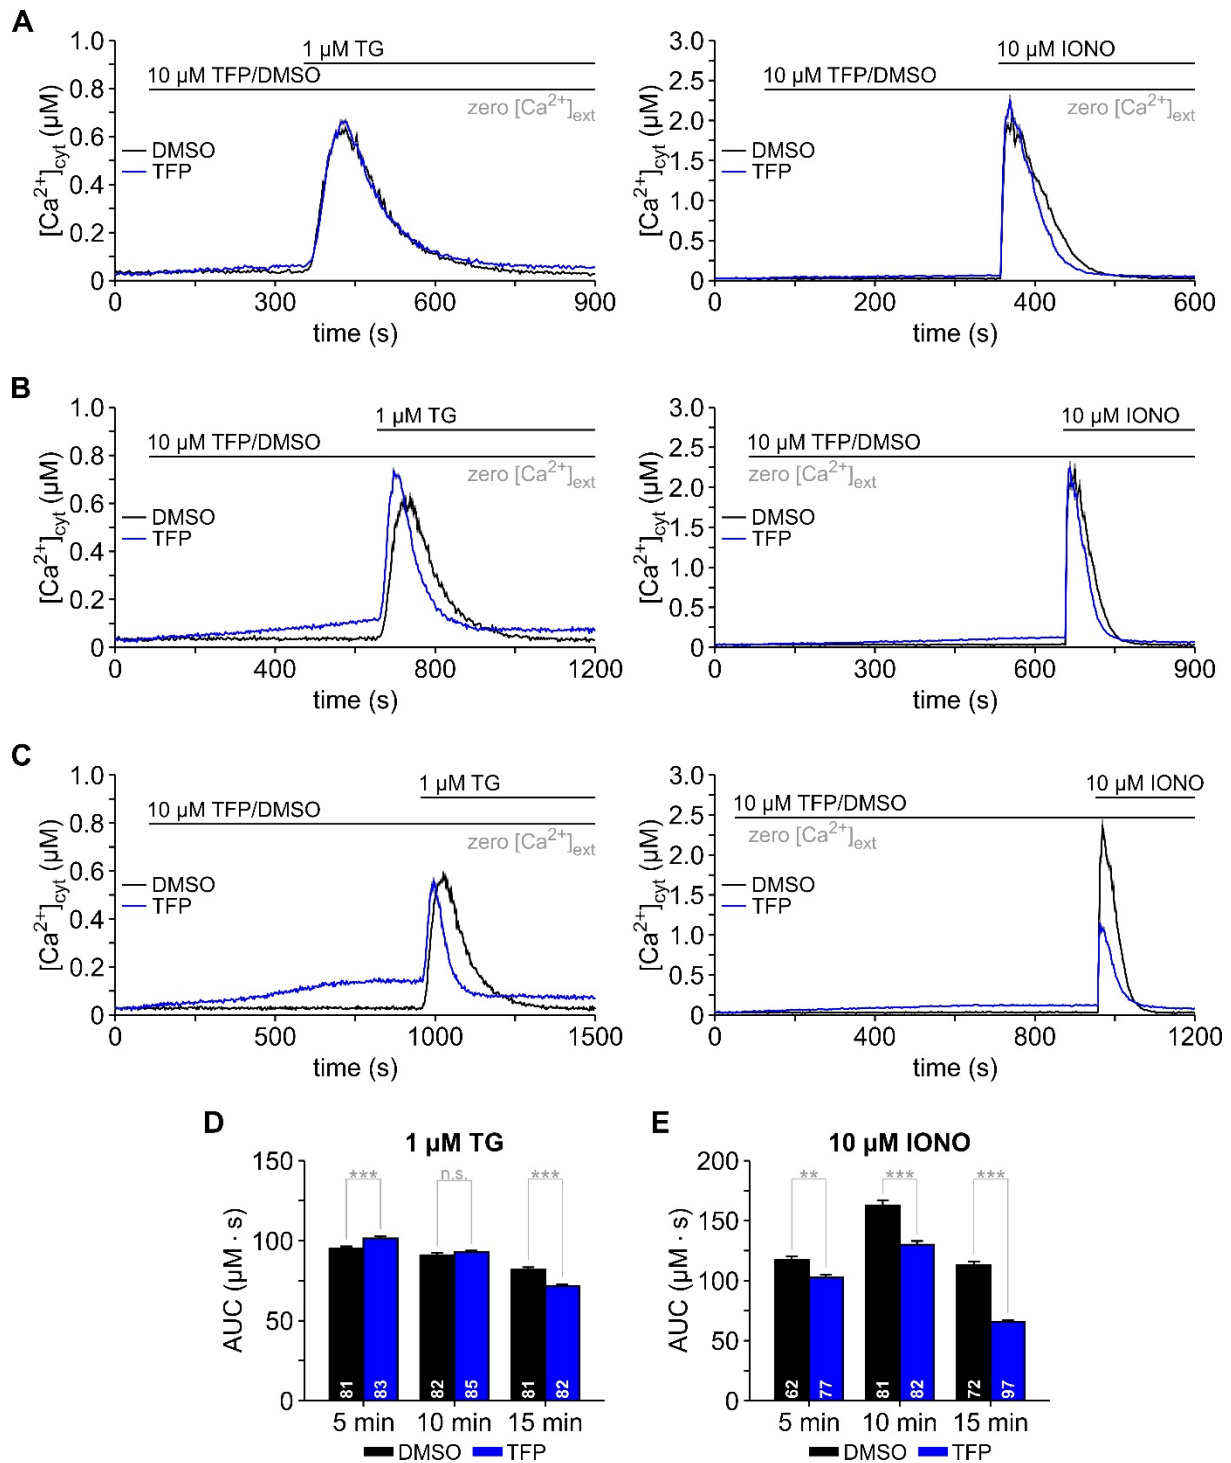

**Supplementary Figure S4. Effects of the  $Ca^{2+}$  leak enhancer trifluoperazine on the  $Ca^{2+}$  mobilisation of HCT116 cells.** Trifluoperazine (TFP) was used as a reference substance for comparison with the effects of mycolactone on ER  $Ca^{2+}$  leak.  $[Ca^{2+}]_{cyt}$  was imaged with FURA-2 in HCT116 cells that were exposed “online” to 10  $\mu M$  TFP (TFP) or 0.05 % DMSO (DMSO) for 5 min (**A**), 10 min (**B**) and 15 min (**C**). At the end of the mycolactone treatment,  $Ca^{2+}$

mobilisation was induced with thapsigargin (1  $\mu$ M TG, *left panels*) or with ionomycin (10  $\mu$ M IONO, *right panels*) to estimate the  $\text{Ca}^{2+}$  leak from ER and the total  $\text{Ca}^{2+}$  content in the cells, respectively. TFP effects on TG- and IONO-induced  $\text{Ca}^{2+}$  transients were quantified as area under the curve (AUC) and are shown in **D** and **E**, respectively. The number of cells is given within the graph bars (**D**, **E**). Data is presented as means  $\pm$  SEM; n.s., non-significant; \*\*,  $p<0.01$ ; \*\*\*,  $p<0.001$ .
